# Supplementary material for: Enhanced passive mixing for paper microfluidics
Source: Royal Society of Chemistry journal article supplement (doi:10.1039/d1ra04916j), 2021-01-01
Supplement: d1ra04916j1.pdf [file d1ra04916j1.pdf]

## ELECTRONIC SUPPLEMENTARY INFORMATION

### CO-FLOW MIXING ON PAPER-BASED DEVICES

Nurul Nadiah Hamidon <sup>a, b</sup>, Gert IJ. Salentijn <sup>c</sup>, Elisabeth Verpoorte <sup>a,\*</sup>

<sup>a</sup> Pharmaceutical Analysis, Groningen Research Institute of Pharmacy, University of Groningen,  
9700 AD Groningen, THE NETHERLANDS

<sup>b</sup> Faculty of Industrial Sciences and Technology, Universiti Malaysia Pahang,  
26300 Kuantan, MALAYSIA

<sup>c</sup> Laboratory of Organic Chemistry, Wageningen University and Research, Stippeneng 4,  
6708 WE Wageningen, THE NETHERLANDS

*\* Corresponding author*

### TABLE OF CONTENTS

|                                                                              |            |
|------------------------------------------------------------------------------|------------|
| <b>Step-by-step procedure for image analysis using ImageJ.....</b>           | <b>S-2</b> |
| <b>Figures.....</b>                                                          | <b>S-7</b> |
| Figure S1: Microscopic image of the hourglass design.....                    | S-7        |
| Figure S2: Saturation signal for KSCN-FeCl <sub>3</sub> solutions mixed..... | S-7        |
| off-paper                                                                    |            |
| Figure S3: Influence of exit-funnel angle on mixing.....                     | S-8        |
| Figure S4: Photographs of NaOH-HCl mixtures wicked into.....                 | S-9        |
| unpatterned paper strips                                                     |            |

# ***STEP-BY-STEP PROCEDURE FOR IMAGE ANALYSIS USING IMAGEJ***

1. Open image in ImageJ

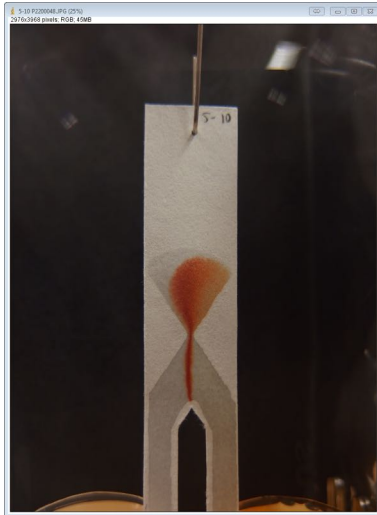

2. Assign region of interest (ROI). Save the ROIs as “**ROI Set A**” for later reference

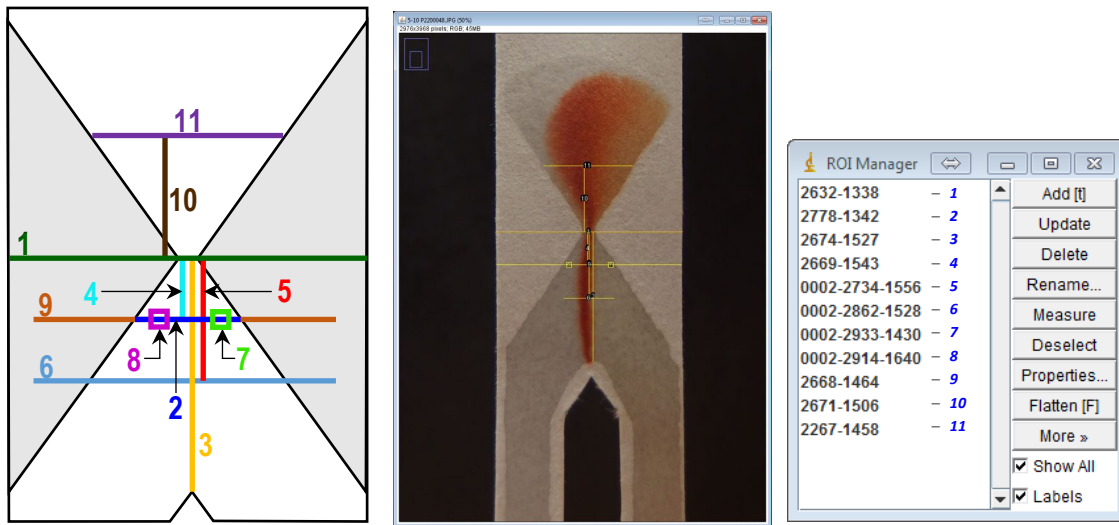

**ROI 1:** The width of paper at the height of the gap.

**ROI 2:** [Dispersion profile](#). Assigned at the same level of ROI 9.

**ROI 3:** The length of the entrance funnel.

**ROI 4:** Half the length of ROI 5 / Quarter the length of ROI 3.

**ROI 5:** Half the length of ROI 3.

**ROI 6:** Reference mark for half the length of the entrance funnel.

**ROI 7:** A square reference area for sampling KSCN baseline signal.

**ROI 8:** A square reference area for sampling FeCl<sub>3</sub> baseline signal.

**ROI 9:** Reference mark for quarter the length of the entrance funnel.

**ROI 10:** Half the length of ROI 3.

**ROI 11:** [Mixing profile](#). Assigned at the same distance.

*(The ROIs were assigned on the image according to the following order:*

*1 → 3 → 6 → 5 → 9 → 4 → 10 → 11 → 8 → 7)*

### 3. Convert image to HSB stacks

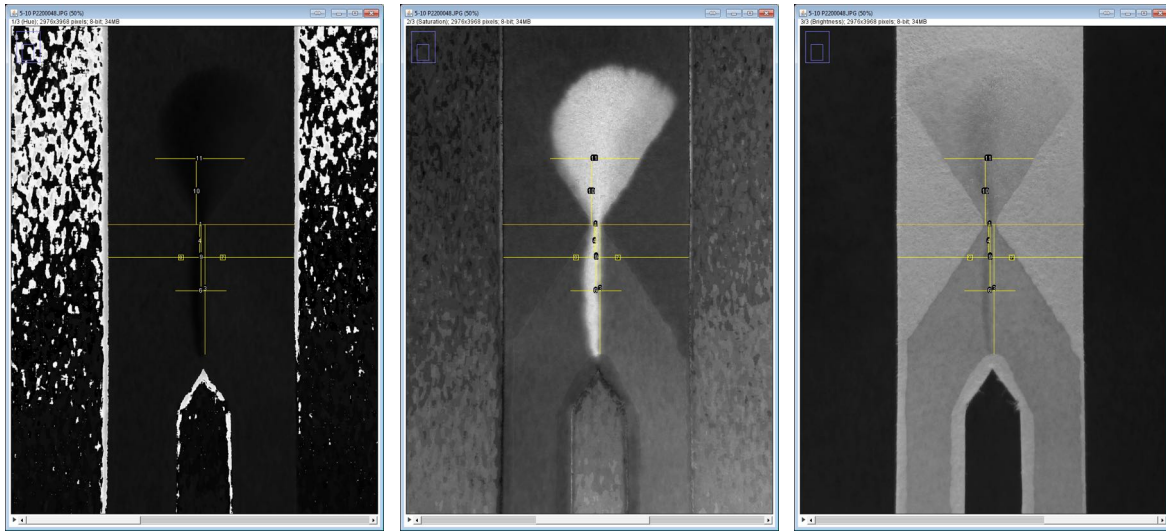

### 4. Perform ROIs measurement, save into Excel file

| Label                                          | Area | Mean          | StdDev       | Min | Max | Angle | Length        |
|------------------------------------------------|------|---------------|--------------|-----|-----|-------|---------------|
| 1 5-10 P2200048.JPG:2632-1338: Saturation      | 760  | 63.817105263  | 29.621938813 | 10  | 219 | 0     | 759           |
| 2 5-10 P2200048.JPG:2778-1342: Saturation      | 205  | 116.131707317 | 53.765989136 | 60  | 219 | 0     | 204           |
| 3 5-10 P2200048.JPG:2674-1527: Saturation      | 528  | 144.560606061 | 13.784741214 | 106 | 178 | -90   | 527           |
| 4 5-10 P2200048.JPG:2669-1543: Saturation      | 134  | 205.746268657 | 12.498232397 | 164 | 231 | -90   | 133.333251953 |
| 5 5-10 P2200048.JPG:0002-2734-1556: Saturation | 264  | 210.996212121 | 9.796988016  | 184 | 245 | -90   | 263.333251953 |
| 6 5-10 P2200048.JPG:0002-2862-1528: Saturation | 207  | 114.067632850 | 51.631397704 | 64  | 222 | 0     | 206.000000000 |
| 7 5-10 P2200048.JPG:0002-2933-1430: Saturation | 400  | 75.992500000  | 3.764688027  | 66  | 96  | 0     | 0.000000000   |
| 8 5-10 P2200048.JPG:0002-2914-1640: Saturation | 400  | 64.130000000  | 2.608661109  | 57  | 74  | 0     | 0.000000000   |
| 9 5-10 P2200048.JPG:2668-1464: Saturation      | 754  | 73.468169761  | 38.462098004 | 23  | 219 | 0     | 753.000000000 |
| 10 5-10 P2200048.JPG:2671-1506: Saturation     | 270  | 195.696296296 | 24.332967242 | 116 | 229 | 90    | 269.333251953 |
| 11 5-10 P2200048.JPG:2267-1458: Saturation     | 362  | 178.129834254 | 37.294920220 | 60  | 227 | 0     | 361.333374023 |

### 5. Choose the ROI for mixing profile (ROI 11)

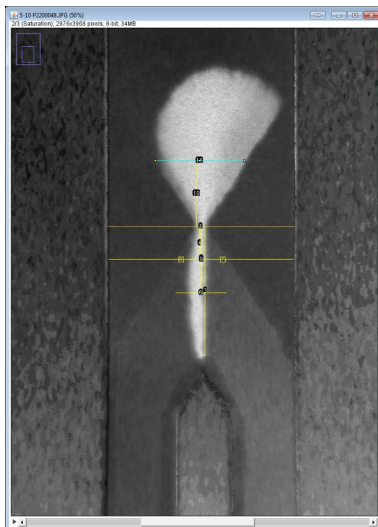

6. Generate the Plot Profile for the ROI of the mixing profile line, save the plot value into Excel file (to be used later for calculating average saturation and standard deviation).

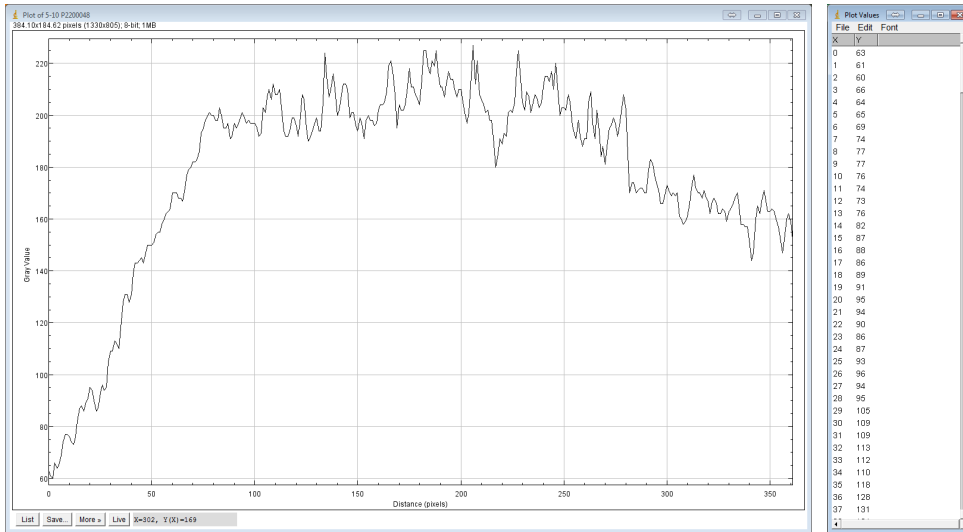

7. Choose the ROI for a horizontal line which is  $\frac{1}{4}$  of the distance from the gap (ROI 2)

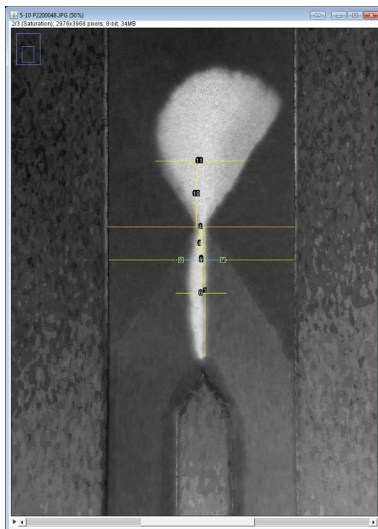

## 8. Generate the Plot Profile of the selected ROI

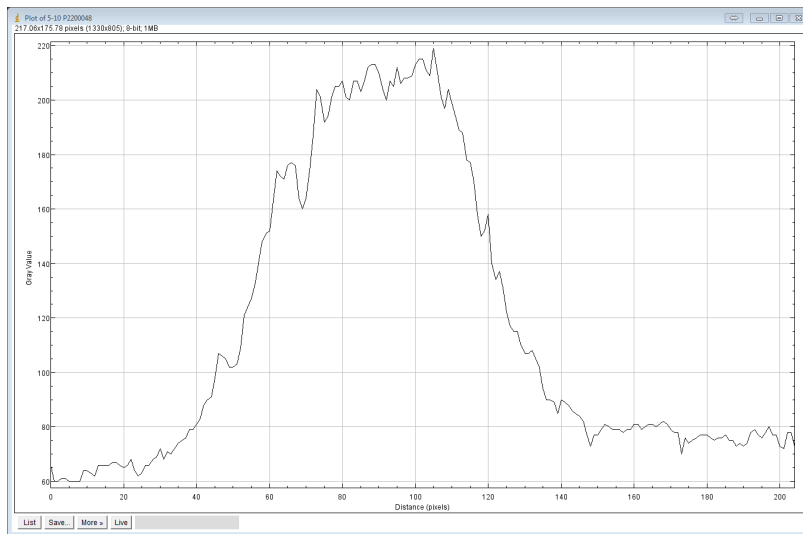

## 9. Assign ROIs. ROIs were saved as “ROI Set B” for later reference

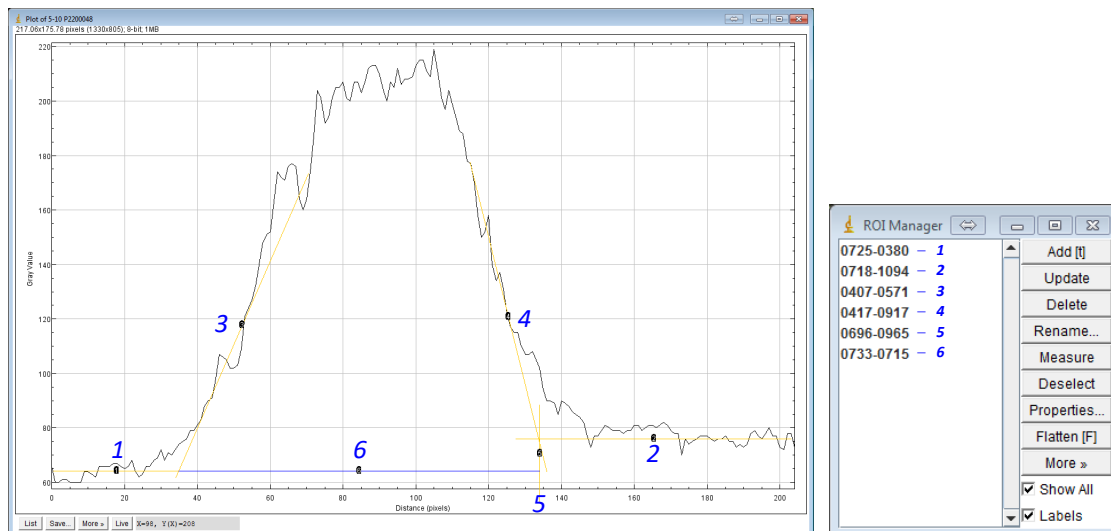

**ROI 1:** The background saturation of KSCN, the value was obtained from the ROI 8 (average saturation) of the ROI Set A.

**ROI 2:** The background saturation of  $\text{FeCl}_3$ , the value was obtained from the ROI 7 (average saturation) of the ROI Set A.

**ROI 3 & ROI 4:** A tangent line to best represent the increment/decline of saturation (along Y-axis).

**ROI 5:** A vertical line representing the ROI 2-ROI 4 intercept (along X-axis).

**ROI 6:** A horizontal line stretching between the ROI 1-ROI 3 intercept and ROI 5. This line basically represents the “peak width” of the diffusion band. By taking consideration of the background saturation of the two reagents and estimated slope/tangent of as threshold.

## FIGURES

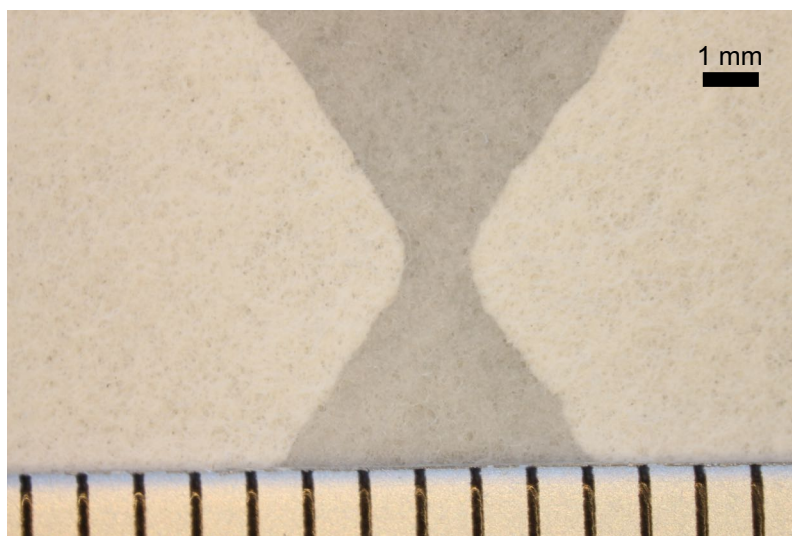

**Figure S1:** Image of an hourglass structure on paper wetted with water, acquired using microscope and camera.

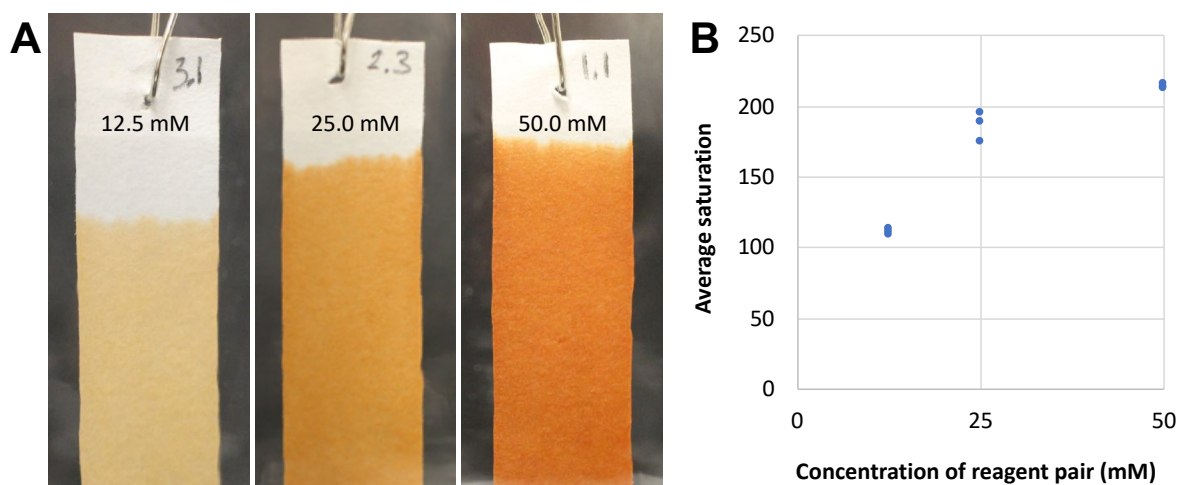

**Figure S2:** Saturation signal for KSCN-FeCl<sub>3</sub> solutions mixed off-paper. Three mixtures were prepared by mixing 1:1 ratio of KSCN solution and FeCl<sub>3</sub> solution having the same concentration; three different concentrations were used (12.5 mM, 25.0 mM and 50.0 mM). (A) One end of the untreated paper was dipped into the mixture to allow wicking into the paper. (B) A plot showing the average saturation of the pre-mixed solutions wicked into paper for the concentrations tested ( $n = 3$  paper strips for each concentration).

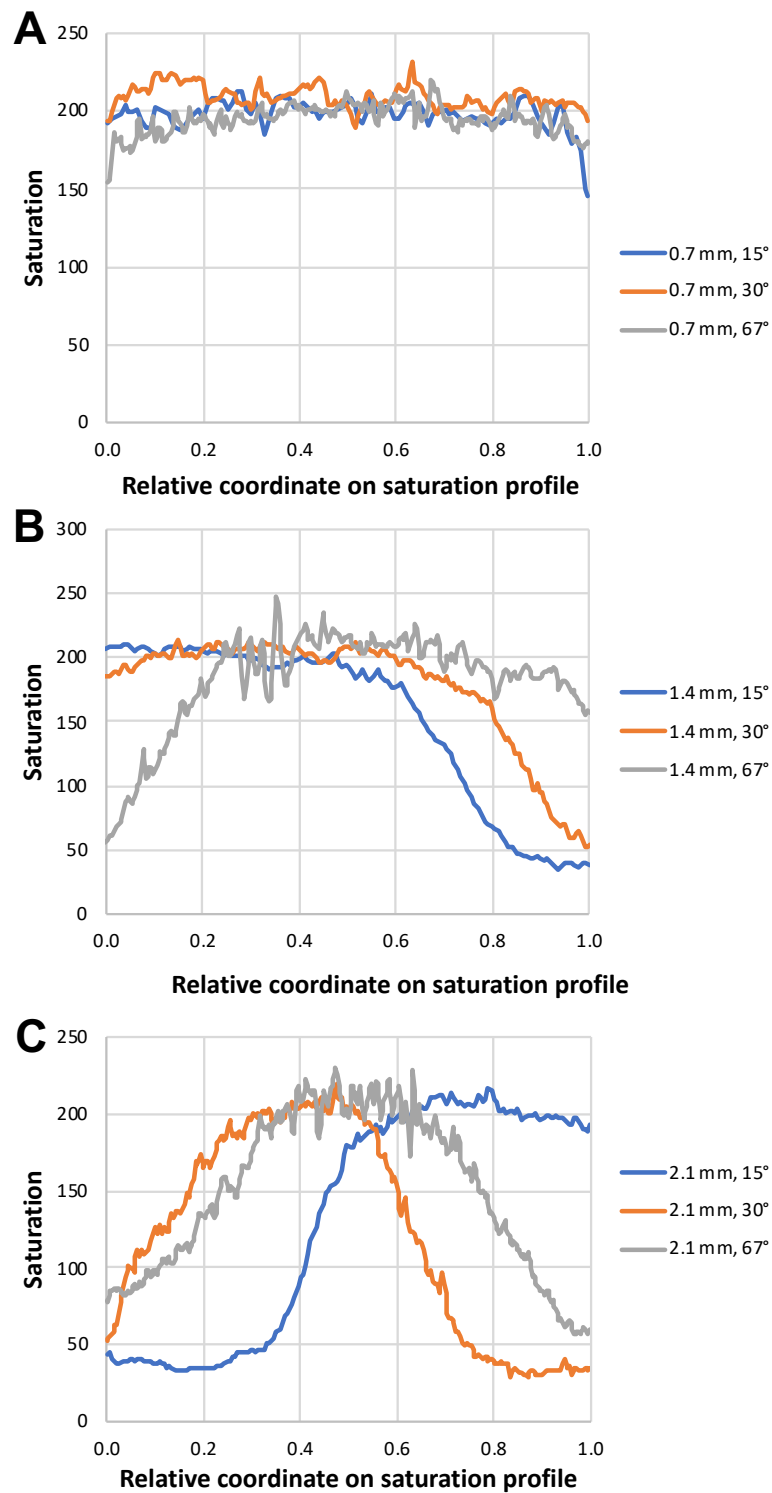

**Figure S3:** Saturation recorded along the mixing profile for three different exit-funnel angles for gap widths of ca. (A) 0.7 mm, (B) 1.4 mm and (C) 2.1 mm. It is apparent that good mixing can be obtained with small gaps regardless of the funnel angle. As the gap becomes bigger, steep changes in saturation are observed, indicating incomplete mixing.



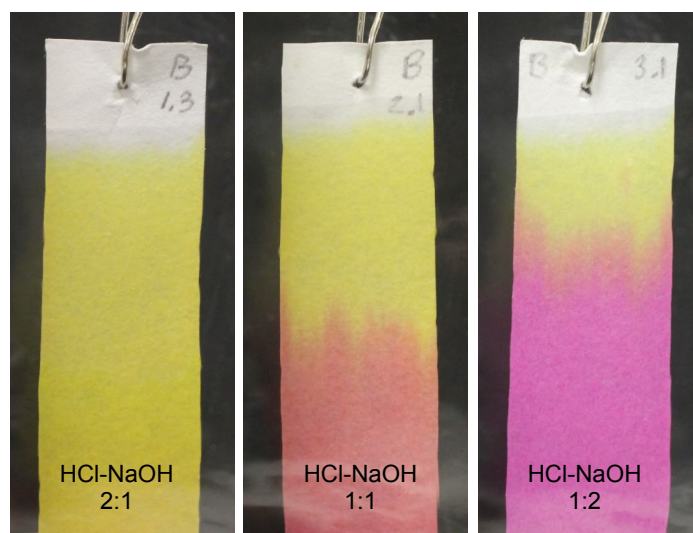

**Figure S4:** Photographs of HCl-NaOH mixtures wicked into unpatterned paper strips. Three mixtures were prepared by mixing 10 mM HCl solution containing Phenol Red (2 mM; as pH indicator) and 10 mM NaOH solution (without Phenol Red) at ratios of 2:1, 1:1 and 1:2. One end of the untreated paper strip was then dipped into the mixed solution to allow wicking into the paper.
